# Supplementary material for: Diagnosis of thymic epithelial tumor subtypes by a quantitative proteomic approach
Source: Royal Society of Chemistry journal article supplement (doi:10.1039/c8an00218e), 2018-01-01
Supplement: c8an00218e1.pdf [file c8an00218e1.pdf]

## Electronic supplementary information

### Diagnosis of Thymic Epithelial Tumor Subtypes by Quantitative Proteomics Approach

Ting Zhao, <sup>†a</sup> Jie Wu, <sup>†b</sup> Xiaohui Liu, <sup>a</sup> Lei Zhang, <sup>a</sup> Gang Chen, <sup>\*b</sup> and Haojie Lu <sup>\*a,c</sup>

a. Institutes of Biomedical Sciences and Department of Chemistry, Fudan University, Shanghai 200032, P.R. China

b. Department of Pathology, Zhongshan Hospital, Fudan University, 180 Fenglin Road, Shanghai 200032, P.R. China

c. Key Laboratory of Glycoconjugates Research Ministry of Public Health, Fudan University, Shanghai 200032, P.R. China.

#### Content of SI materials

Supplementary Table S1. Antibody information

Supplementary Figure S1. Venn diagram depicting the overlap of peptides identified and quantified in three independent experiments.

Supplementary Table S1. Antibody information

| Antibody | Clone      | Company | Antigen retrieval | Dilution | Stain                  |
|----------|------------|---------|-------------------|----------|------------------------|
| ABCE1    | EPR15373   | Abcam   | EDTA              | 1/100    | Cytoplasm              |
| CHD1L    | EPR14515   | Abcam   | Tris/EDTA         | 1/250    | Nucleus                |
| CLIC2    | EPR6494    | Abcam   | Tris/EDTA         | 1/50     | Cytoplasm/<br>Membrane |
| MAP7     | Polyclonal | Abcam   | Tris/EDTA         | 1/100    | Cytoplasm              |
| SMAD4    | EP618Y     | Abcam   | EDTA              | 1/100    | Cytoplasm              |
| CDC42    | EPR15620   | Abcam   | EDTA              | 1/250    | Membrane               |

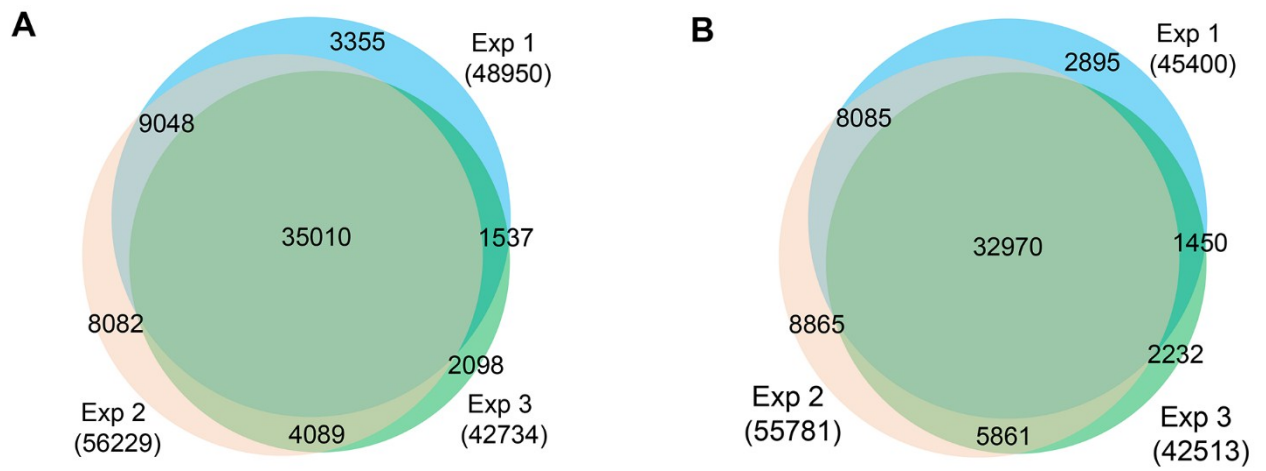

Supplementary Figure S1. Peptide identification and quantification. Venn diagram depicting the overlap of peptides identified (A) and quantified (B) in three independent iTRAQ experiments. The numbers in parentheses indicate the peptide numbers in each experiment.
